# Supplementary material for: Coexpression of Fungal Cell Wall-Modifying Enzymes Reveals Their Additive Impact on Arabidopsis Resistance to the Fungal Pathogen, Botrytis cinerea
Source: MDPI journal article supplement (doi:10.3390/biology10101070), 2021-10-19
Supplement: s1 [file s1]

## Supplementary Materials

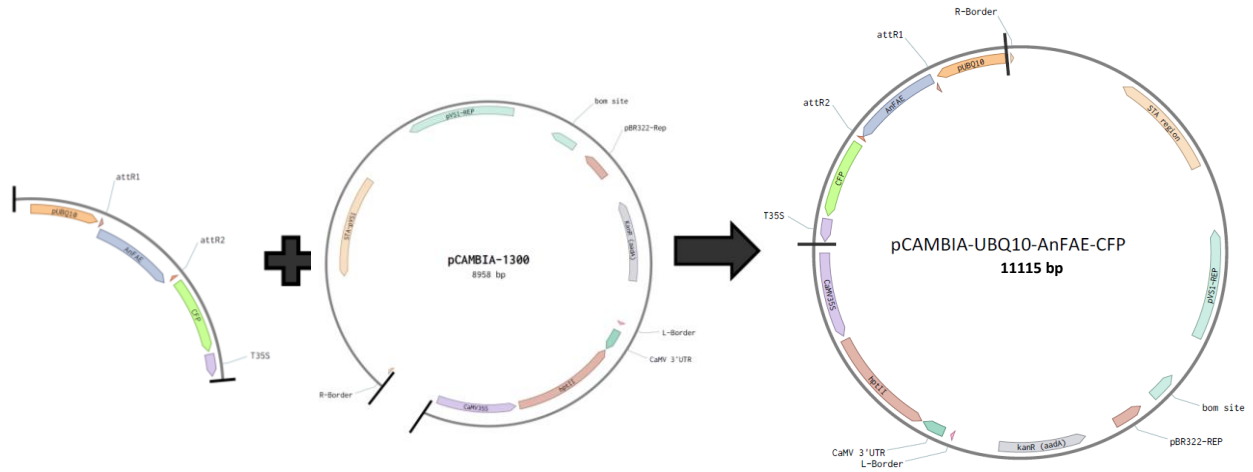

**Figure S1.** Gibson assembly scheme for the generation of recombinant vector, pCAMBIA-UBQ10-AnFAE-CFP used in this study. The expression cassette contains the UBQ10 promoter, *AnFAE*-CFP fusion gene, and the 35S terminator were ligated together to the backbone from the pCAMBIA-1300-MCS expression vector using one-step Gibson assembly. Similar strategy was used to clone *AnAXE* and *AnRAE* genes into pCAMBIA-1300-MCS.

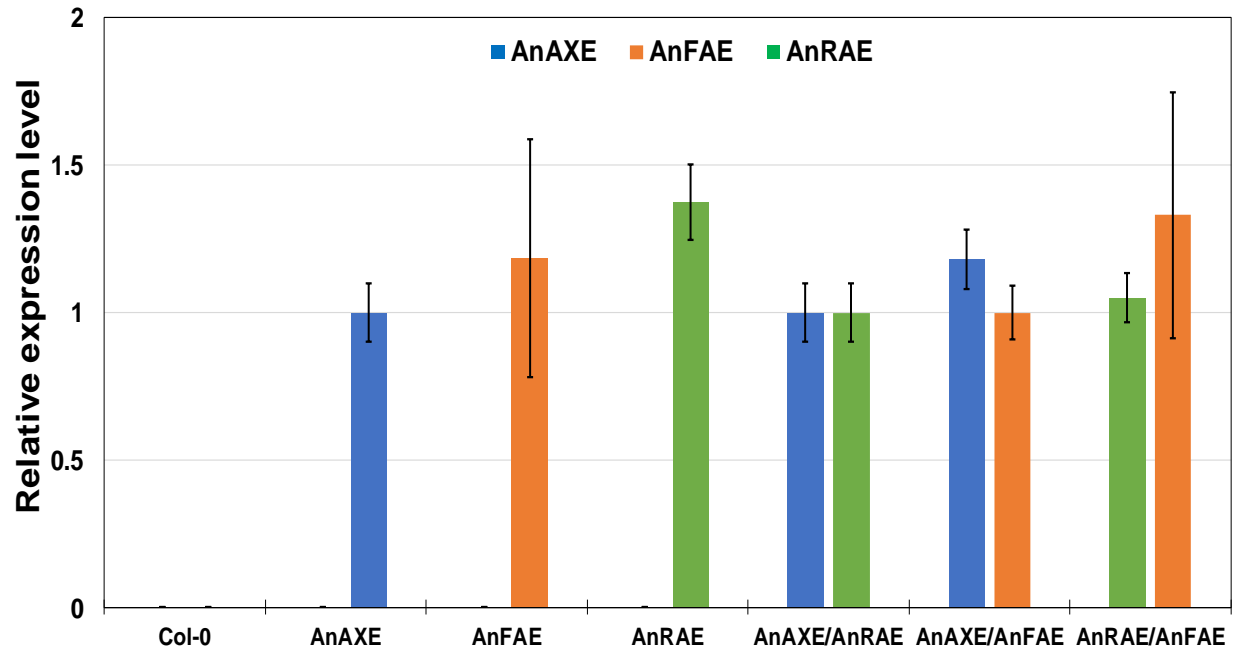

**Figure S2.** Real time-qPCR analysis of transcript level of transgenes in transgenic lines and WT plants (Col-0). RT-qPCR analysis was conducted to find out the transcript level of individual introduced transgenes in six different transgenic lines (*AnAXE*, *AnRAE*, *AnFAE*, *AnAXE/AnRAE*, *AnAXE/AnFAE* and *AnRAE/AnFAE*). *ACTIN2* was used as a reference gene to normalize the data. The transcript data represents average and  $\pm$  SD of three different independent transgenic lines for each construct. Asterisks indicate significant differences between the mean transcript level among the transgenic plants and WT plants (Student's t test,  $p < 0.05$ ;  $n=3$ ).

**Table S1.** List of primers used in this study (5'-3').

| Name of the primer | Sequence of the primer  |
|--------------------|-------------------------|
| AtPR1-F            | TCTAAGGGTTCACAACCAGG    |
| AtPR1-R            | CCTTCTCGCTAACCCACATG    |
| AtPR5-F            | GAGGATCGGGAGATTGCAAA    |
| AtPR5-R            | GTCAGGGCAAGCGTTCTTGA    |
| AtbG2-F            | GACGCAAATCTCGACTCGGT    |
| AtbG2-R            | TCTCTATAGCTTTCCTGGC     |
| AtPAD3-F           | ACTCTGGGAAAACGCAGATG    |
| AtPAD3-R           | CTTTGGCTTCCTCCTGCTTC    |
| AtJR1-F            | GTGTCGGGCTACTATGACAA    |
| AtJR1-R            | GGGCGCAACATTGACTCCAA    |
| AtWR3-F            | TTCGTGCCTACGCGGTTGAT    |
| AtWR3-R            | CTATCTTGGCCTTCCTCTTC    |
| AtPGIP-F           | CAGCTCAAGAATCTCGAGTT    |
| AtPGIP-R           | TCGATCCGGTTAAAGTCGAT    |
| AtWRKY-F           | CTAGAGACAATCCATCTCCA    |
| AtWRKY-R           | TGCTGCAACGGGTGTTGAAG    |
| AtCYP-F            | CAGCTGCACCACTTCTTGTT    |
| AtCYP-R            | CACCAGGACACGTTCTTCGT    |
| AtRetO-F           | AATGATGGATCGGATTCCGT    |
| AtRetO-R           | ACCGCTTGGATTGCTTCCAA    |
| AtJaPDF1.2-F       | TTGCTTCCATCATCACCTT     |
| AtJaPDF1.2-R       | CACTTGGCTTCTCGCACAAC    |
| AtActin2_F         | GAAACCCTCGTAGATTGGCA    |
| AtActin2_R         | CTCTCCCGCTATGTATGTCGC   |
| AnAXE-F            | CGATCCACTACTGCACTGGAAC  |
| AnAXE-R            | GTTAGAGTTGACTGCGAGCTGAC |
| AnRAE-F            | CCATGGCGTCCAGTACTCCTG   |
| AnRAE-R            | GTCGCCTGCTTGAAGGACGTC   |

|         |                       |
|---------|-----------------------|
| AnFAE-F | GATGGCTACGACCCAAGCAAG |
| AnFAE-R | CAGCCAGCATTGACACCGTTG |
